# Supplementary material for: Managing domestic trade for food security with environmental and economic equity in China
Source: Research Square preprint supplement (doi:10.21203/rs.3.rs-6990559/v1), 2025-09-12
Supplement: Supplementary file 1 [file 48e394bab3ca273841b15efa.pdf]

## **Managing domestic trade for food security with environmental and economic equity in China**

Chen wang<sup>1,2</sup>, Xiuming Zhang<sup>2,3</sup>, Chenchen Ren<sup>4</sup>, Xin Xuan<sup>5</sup>, Luxi Cheng<sup>1,2</sup>, Yiyang Zou<sup>1,2</sup>, Jianming Xu<sup>1,2,6</sup>, Baojing Gu<sup>1,2,7\*</sup>

<sup>1</sup> State Key Laboratory of Soil Pollution Control and Safety, Zhejiang University, Hangzhou 310058, China

<sup>2</sup> College of Environmental and Resource Sciences, Zhejiang University, Hangzhou 310058, PR China

<sup>3</sup> International Institute for Applied Systems Analysis, Schlossplatz 1, A-2361, Laxenburg, Austria

<sup>4</sup> Biosphere Sciences and Engineering, Carnegie Institution for Science, Stanford, CA, USA

<sup>5</sup> School of Land Science and Technology, China University of Geosciences, Beijing 100083, China

<sup>6</sup> Zhejiang Provincial Key Laboratory of Agricultural Resources and Environment, Zhejiang University, Hangzhou, 310058, China

<sup>7</sup> Policy Simulation Laboratory, Zhejiang University, Hangzhou, 310058, China

\*Corresponding Author:

College of Environmental & Resource Sciences, Zhejiang University, Zijingang Campus, 866 Yuhangtang Road, Hangzhou 310058, PR China. Tel & Fax: +86 571 8820 6926.

E-mail addresses: [bjgu@zju.edu.cn](mailto:bjgu@zju.edu.cn) (B.G.)

**Supplementary Methods**

**Supplementary Figure S1-S7**

**Supplementary Table S1-9**

## Supplementary Methods

### Estimation of embedded N emission in interprovincial grain trade

To evaluate the nitrogen-related environmental burdens embedded in interprovincial grain trade, we calculated both the total associated nitrogen losses from agricultural production. The virtual N embedded in traded grain refers to the N related pollutants emitted during the production of traded grains. To quantify nitrogen losses during production, we considered four key pathways: ammonia volatilization (NH<sub>3</sub>), nitrogen oxide (NO) emissions, nitrate leaching, and surface runoff. These losses were estimated using region-specific nitrogen application rates and standard emission factors based on IPCC guidelines and CHANS model. Ammonia and NO emissions were calculated as fixed fractions of applied nitrogen, while leaching and runoff were estimated using average loss coefficients calibrated to crop type. All calculations were based on annual provincial-level data, and the specific calculation is as follows:

$$N_{NH3} = \sum_{i=1}^n (VLTS_i \times N_{rate,i} \times EF_{NH3})$$
$$N_{NO} = \sum_{i=1}^n (VLTS_i \times N_{rate,i} \times EF_{NO})$$
$$N_{NO} = \sum_{i=1}^n (VLTS_i \times N_{rate,i} \times (EF_{leaching} + EF_{runoff}))$$

Where  $N_{NH3}$  is the total magnitude of NH<sub>3</sub> volatilization,  $VLTS_i$  is the area of virtual cropland transferred from province  $i$ ,  $N_{rate,i}$  is the unit fertilization rate, specific provincial parameters are available in the [Table S2](#),  $EF_{NH3}$ ,  $EF_{NO}$  and  $EF_{leaching}$   $EF_{runoff}$  are the NH<sub>3</sub> and NO emission factors of nitrogen fertilizer, and the NO<sub>3</sub><sup>-</sup> nitrogen loss to water coefficient includes the leaching and runoff, the relevant parameters can be found in the CHANS model. The parameters were determined from the built-in parameters of the CHANS model and took an empirical value of 9%, based on integrated parameters derived from extensive historical survey data within the CHANS model. Detailed parameters within the CHANS model can refer to Gu et al<sup>1</sup> and Xu et al<sup>2</sup>.

### Estimation of embedded GHG emission in interprovincial grain trade

The virtual GHG embedded in traded grain refers to the carbon related pollutants emitted during the grain production process, including CO<sub>2</sub>, CH<sub>4</sub>, and N<sub>2</sub>O. To assess total associated GHG emissions from agricultural production, we accounted for methane (CH<sub>4</sub>) emissions from rice paddies, nitrous oxide (N<sub>2</sub>O) emissions from fertilizer use, and carbon dioxide (CO<sub>2</sub>) emissions from agricultural machinery inputs and biomass burning. Emissions were calculated using crop-specific activity data and emission factors based on CHANS model. Methane emissions were estimated based on rice cultivation area and management regimes; N<sub>2</sub>O emissions were derived from N input and direct and indirect emission factors; CO<sub>2</sub> emissions were calculated from diesel fuel use, biomass burning. All GHGs were expressed in CO<sub>2</sub>-equivalents using global warming potential values (GWP100) of 27.9 for CH<sub>4</sub>, 273 for N<sub>2</sub>O, and 1 for CO<sub>2</sub><sup>3,4</sup>. The specific calculation is as follows:

$$CH_{4_{rice}} = \sum_{i=1}^n \left( VLTS_i \times A_{ratio,i} \times EF_{CH4} \times \frac{12}{16} \times 27.9 \right)$$

Where  $CH_{4_{rice}}$  refers to CH<sub>4</sub> emissions from flooding of rice paddies (kg CO<sub>2</sub>-eq), and

$A_{ratio,i}$  is the proportion of rice cultivation area to grain crop area in province  $i$ .  $EF_{CH_4}$  is the  $CH_4$  emission factor of rice paddies, 12/16 is the molecular conversion factor, and 27.9 is conversion factor from  $CH_4$  to  $CO_2^3$ .

$$N2O_{fertilizer} = \sum_{i=1}^n (VLTS_i \times N_{rate,i} \times EF_{N2O} \times 273)$$

Where  $N2O_{fertilizer}$  refers to the  $N_2O$  emissions from the application of nitrogen fertilizer (kg  $CO_2$ -eq),  $EF_{N2O}$  is the  $N_2O$  emission factor of nitrogen fertilizer, the relevant parameters can be found in the CHANS model. For the calculation of total GHG emissions, we converted  $N_2O$  and  $CH_4$  emissions into their  $CO_2$ -equivalent ( $CO_2$ -e) values using the global warming potential (GWP) metrics provided by the Intergovernmental Panel on Climate Change (IPCC)<sup>4</sup> over a 100-year time horizon: GWP of 273 for  $N_2O$  and 27.9 for  $CH_4$ , respectively.

$$CO_{2biomass} = \sum_{i=1}^n (T_i \times Straw_{ratio} \times EF_{CO2})$$

Where  $CO_{2biomass}$  refers  $CO_2$  emissions generated from straw burning,  $T_i$  denotes the amount of grain flowing from provinces  $i$  (kg).  $Straw_{ratio}$  is ratio of straw to grain and  $EF_{CO2}$  is the  $CO_2$  emission factor, which was determined from the built-in parameters of the CHANS model, 12/44 is the molecular conversion factor.

To estimate the carbon emissions from agricultural machinery embedded in interprovincial grain trade, we adopted a factor-based approach using CHANS model outputs. Specifically, we multiplied the estimated  $CO_2$  emission intensity per unit of grain production (kg  $CO_2$  per ton), derived from CHANS simulations, by the volume of traded grain between provinces. This provided a spatially explicit quantification of machinery-related  $CO_2$  emissions embedded in grain flows.

$$CO_{2machinery} = \sum_{i=1}^n (T_i \times EF_{CO2})$$

Where  $CO_{2machinery}$  refers  $CO_2$  emissions generated from agricultural machinery fossil fuel combustion,  $T_i$  denotes the amount of grain flowing from provinces  $i$  (kg).  $EF_{CO2}$  is the  $CO_2$  emission factor, which was determined from the built-in parameters of the CHANS mode.

$$CO_{2soil} = \sum_{i=1}^n \left( VLTS_i \times EF_{CO2} \times \frac{44}{12} \right)$$

Where  $CO_{2soil}$  refers  $CO_2$  emissions generated from soil respiration,  $VLTS_i$  is the area of virtual cropland transferred from province  $i$ ,  $EF_{CO2}$  is the  $CO_2$  emission factor from soil, which was determined from the built-in parameters of the CHANS mode.

### Estimation of embedded carbon sink in interprovincial grain trade

To quantify the carbon sink embedded in interprovincial grain trade, we evaluated two primary carbon sequestration pathways associated with grain production: carbon sequestration in crop biomass ( $CS_{crop}$ ) and in cropland soil ( $CS_{soil}$ ). The total embedded carbon sink, defined as the sum of these components, represents the sequestration ecosystem service provided by the grain-exporting region.

**Carbon Sequestration in crop biomass:** This component refers to the carbon fixed in the non-harvested parts of the plant (primarily straw and roots) through photosynthesis

during the growing season. We estimated this based on the volume of grain traded between provinces. The calculation involved multiplying the traded volume of each crop type (rice, wheat, and maize) by its corresponding crop-specific straw-to-grain ratio and the average carbon content coefficient of the straw. These crop-specific parameters were sourced from published literature and the CHANS model parameter library. Carbon Sequestration in cropland soil: This component represents the net annual increase in soil organic carbon (SOC) associated with the “virtual cropland” transferred through trade. It was calculated by multiplying the area of virtual cropland transferred ( $VLT_{Si}$ ) by an average SOC sequestration rate for the given province and cropping system. This rate (in tons of C per hectare per year) is influenced by agricultural management practices such as tillage methods (e.g., conservation tillage), straw return levels, and irrigation. The values used were derived from long-term field experiment studies in relevant regions and simulation results from the CHANS model.

**Supplementary Figure:**

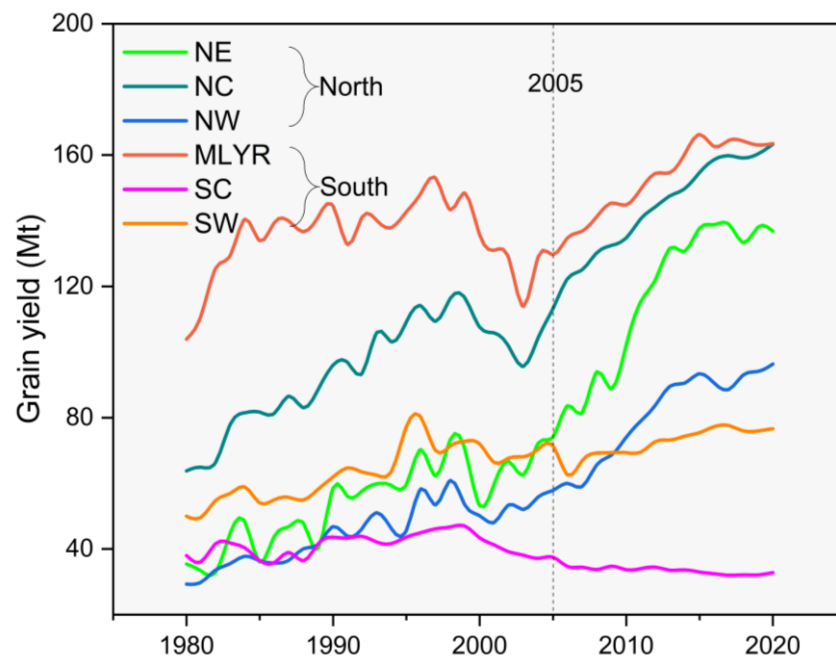

**Fig. S1 Changes in grain production trends in different regions (Mt: million tons)**

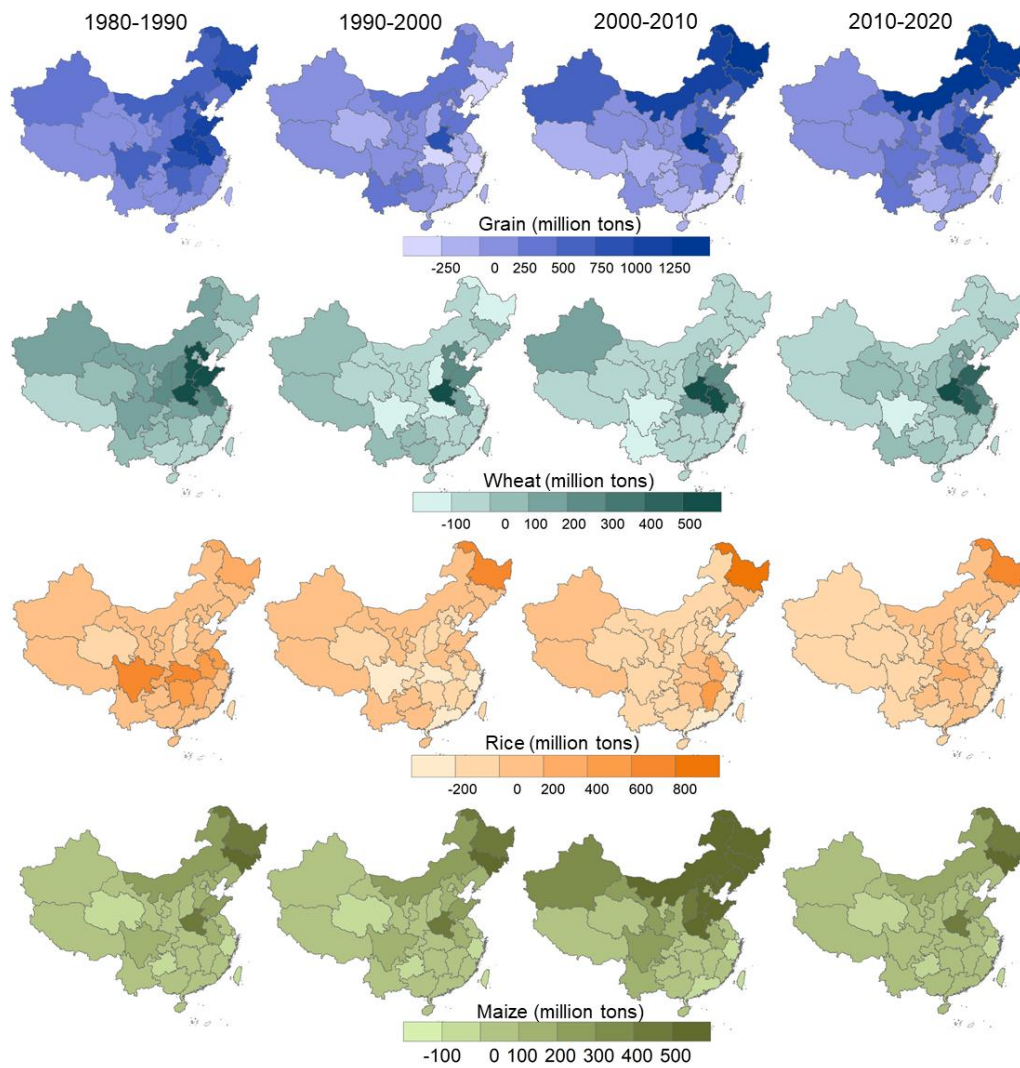

**Fig. S2| Changes in spatial variation of grain production every decade in China**  
(From top to bottom: grain; wheat; rice; maize)

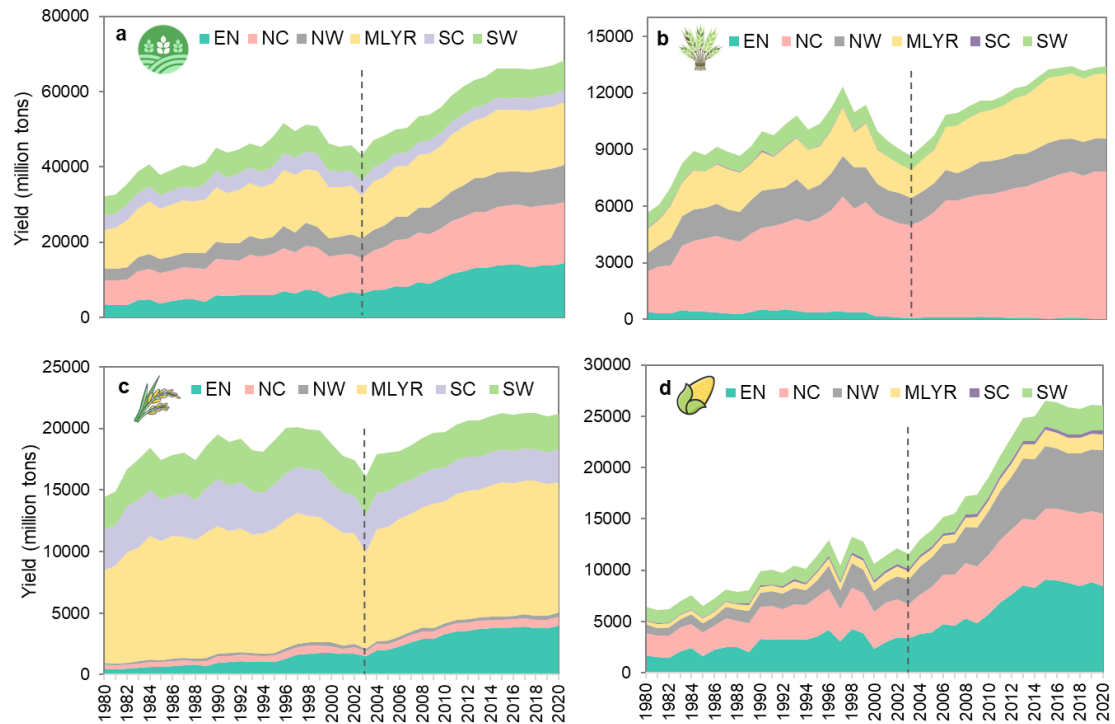

**Fig. S3 | Changes in grain production from 1980 to 2020. (a) grain, (b) wheat, (c) rice, (d) maize; NE: Northeast Region, NC: North China Region, NW: northwest region, MLYR: Middle and Lower Yangtze River Region; SC: Southern China Region; SW: Southwest Region.**

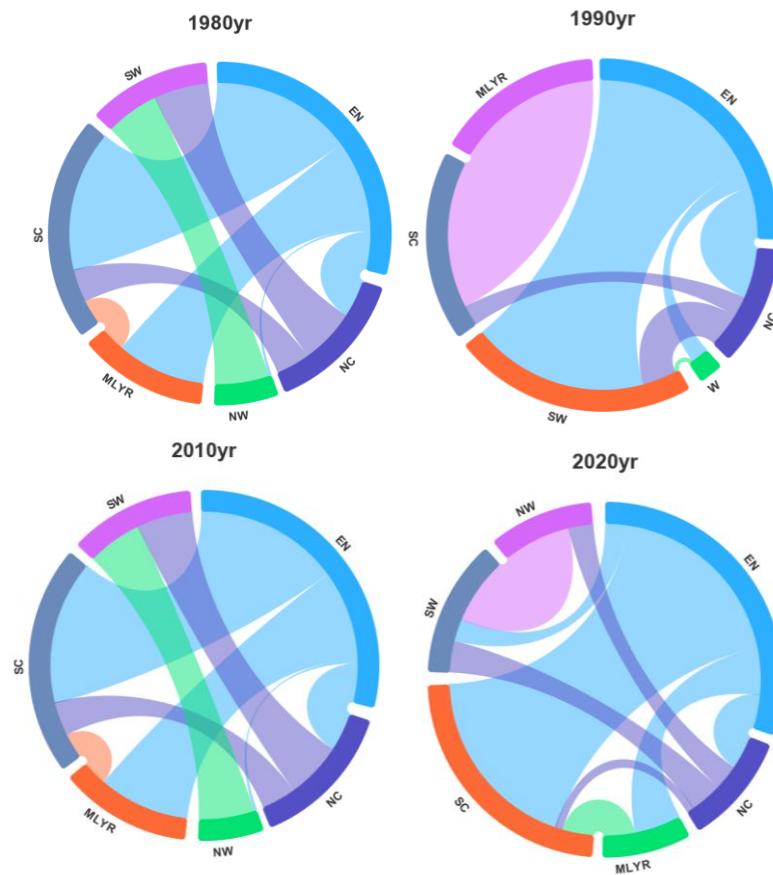

**Fig. S4 | Simulation of trade flows of grains in China.** NE: Northeast Region, NC: North China Region, NW: northwest region, MLYR: Middle and Lower Yangtze River Region; SC: Southern China Region; SW: Southwest Region.

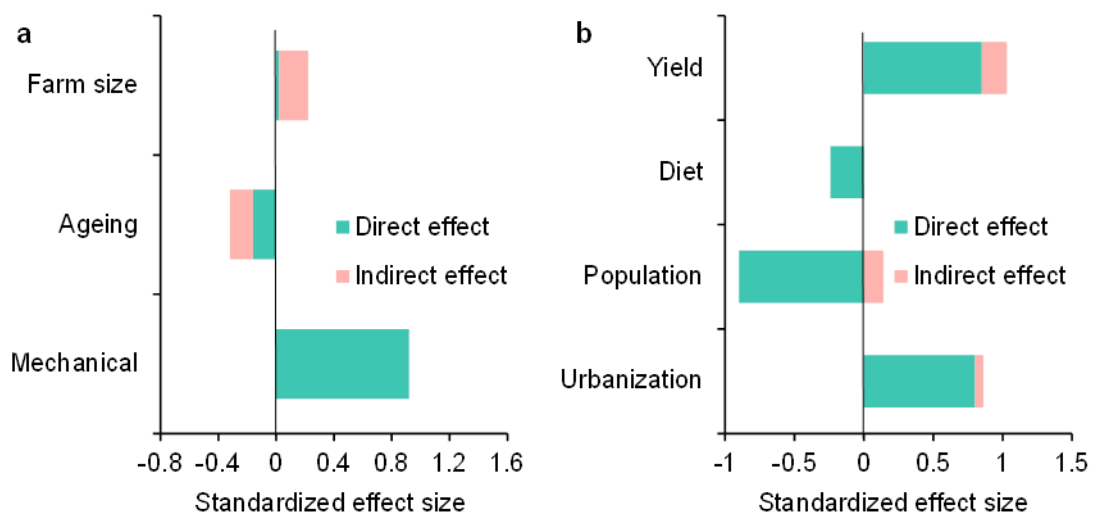

**Fig. S5| Summed direct and indirect effects in Structural equation model.** a: grain production. b: grain trade



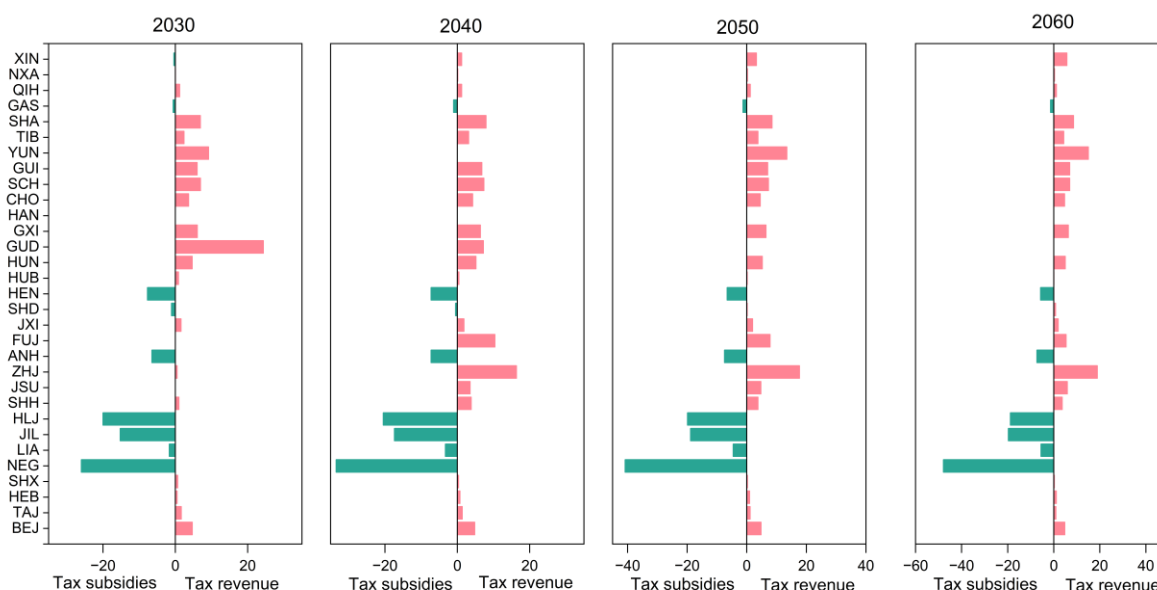

**Fig. S6 | Tax amounts in different provinces under SSP scenario.** The blue label on the left side of the horizontal axis represents the provinces that require subsidies, while the one on the right side represents the provinces that require taxes

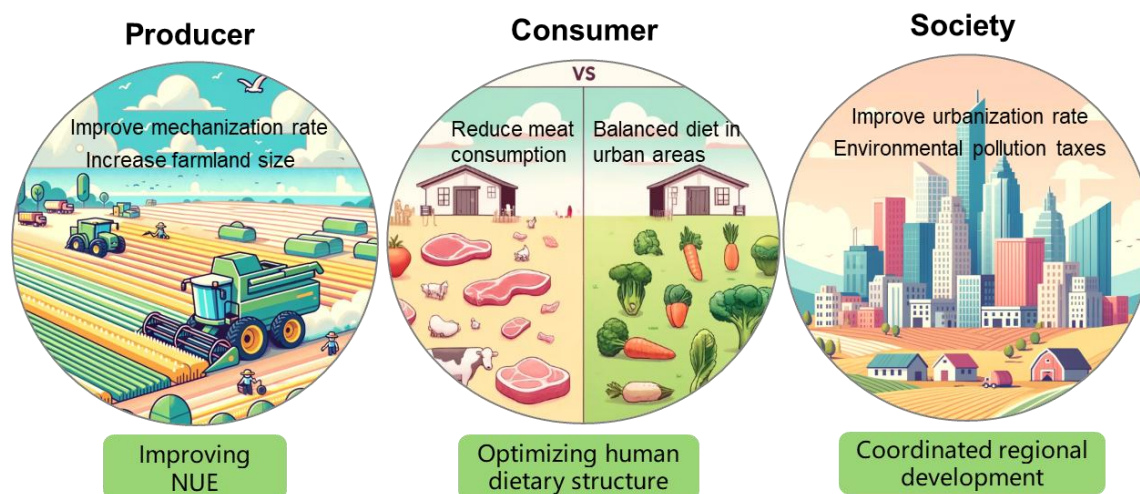

**Fig. S7 | Opportunities for improvements for different stakeholders.** A non-exhaustive range of promising options for farmers, manufacturers and consumers to reduce the environmental impacts of grain production.

**Table S1** The abbreviation of agricultural region and 31 provinces, autonomous regions, and municipalities directly under the Central Government.

| Agricultural region                           |                                       | Abbreviation | Province       | Abbreviation |
|-----------------------------------------------|---------------------------------------|--------------|----------------|--------------|
| The provinces of Northern China in this study | North China                           | NC           | Beijing        | BEJ          |
|                                               |                                       |              | Tianjin        | TAJ          |
|                                               |                                       |              | Hebei          | HEB          |
|                                               |                                       |              | Henan          | HEN          |
|                                               |                                       |              | Shandong       | SHD          |
|                                               | Northeast Region                      | NE           | Liaoning       | LIA          |
|                                               |                                       |              | Jilin          | JIL          |
|                                               |                                       |              | Heilongjiang   | HLJ          |
|                                               | Northwest Region                      | NW           | Shanxi         | SHX          |
|                                               |                                       |              | Inner Mongolia | NEG          |
| Shanxi                                        |                                       |              | SHA            |              |
| Gansu                                         |                                       |              | GAS            |              |
| Qinghai                                       |                                       |              | QIH            |              |
| Ningxia                                       |                                       |              | NXA            |              |
| Xinjiang                                      |                                       |              | XIN            |              |
| The provinces of Southern China in this study | Middle and Lower Yangtze River Region | MLYR         | Shanghai       | SHH          |
|                                               |                                       |              | Jiangsu        | JSU          |
|                                               |                                       |              | Zhejiang       | ZHJ          |
|                                               |                                       |              | Anhui          | ANH          |
|                                               |                                       |              | Jiangxi        | JXI          |
|                                               |                                       |              | Hubei          | HUB          |
|                                               |                                       |              | Hunan          | HUN          |
|                                               | Southwest Region                      | SW           | Chongqing      | CHO          |
|                                               |                                       |              | Sichuan        | SCH          |
|                                               |                                       |              | Guizhou        | GUI          |
|                                               |                                       |              | Yunnan         | YUN          |
|                                               |                                       |              | Xizang         | TIB          |
|                                               | Southern China Region                 | SC           | Fujian         | FUJ          |
|                                               |                                       |              | Guangdong      | GUD          |
| Guangxi                                       |                                       |              | GXI            |              |
| Hainan                                        |                                       |              | HAN            |              |

**Table S2** Fertilization rates for different crops in each province

| Province       | Rice  | Wheat | Maize | Average |
|----------------|-------|-------|-------|---------|
| Beijing        | 171.7 | 267.2 | 161.7 | 200.2   |
| Tianjin        | 178.1 | 269.2 | 159.9 | 202.4   |
| Hebei          | 186.1 | 254.0 | 142.1 | 194.1   |
| Shanxi         | 170.7 | 190.5 | 125.6 | 162.3   |
| Inner Mongolia | 171.6 | 368.5 | 201.6 | 247.3   |
| Liaoning       | 138.5 | 233.1 | 140.8 | 170.8   |
| Jilin          | 172.9 | 291.4 | 160.9 | 208.4   |
| Heilongjiang   | 97.6  | 105.4 | 96.2  | 99.7    |
| Shanghai       | 193.6 | 213.3 | 185.5 | 197.5   |
| Jiangsu        | 228.2 | 209.6 | 240.1 | 226.0   |
| Zhejiang       | 196.4 | 269.2 | 194.8 | 220.1   |
| Anhui          | 201.4 | 228.4 | 179.0 | 202.9   |
| Fujian         | 201.4 | 239.8 | 213.4 | 218.2   |
| Jiangxi        | 119.4 | 123.4 | 116.9 | 119.9   |
| Shandong       | 195.4 | 183.9 | 143.5 | 174.3   |
| Henan          | 156.0 | 238.0 | 175.1 | 189.7   |
| Hubei          | 148.0 | 133.0 | 182.7 | 154.5   |
| Hunan          | 142.4 | 123.1 | 194.3 | 153.3   |
| Guangdong      | 169.1 | 139.4 | 180.9 | 163.1   |
| Guangxi        | 130.9 | 94.5  | 128.1 | 117.8   |
| Hainan         | 161.4 | 123.1 | 187.6 | 157.3   |
| Chongqing      | 155.1 | 135.1 | 171.1 | 153.8   |
| Sichuan        | 166.7 | 130.7 | 179.6 | 159.0   |
| Guizhou        | 110.2 | 65.1  | 148.1 | 107.8   |
| Yunnan         | 172.0 | 170.3 | 224.4 | 188.9   |
| Xizang         | 277.9 | 236.2 | 331.3 | 281.8   |
| Shanxi         | 196.0 | 220.6 | 287.2 | 234.6   |
| Gansu          | 188.4 | 177.1 | 253.5 | 206.4   |
| Qinghai        | 197.4 | 158.4 | 193.4 | 183.1   |
| Ningxia        | 196.0 | 231.8 | 250.8 | 226.2   |
| Xinjiang       | 123.7 | 177.5 | 212.0 | 171.1   |

Data source: National Compilation of Cost-Benefit Data of Agricultural Products<sup>5</sup>

**Table S3** The CH<sub>4</sub> emission factors of rice by provinces in China (kg ha<sup>-1</sup>)

| Province       | Rice  | Province  | Rice  |
|----------------|-------|-----------|-------|
| Beijing        | 234.0 | Henan     | 236.7 |
| Tianjin        | 234.0 | Hubei     | 236.7 |
| Hebei          | 234.0 | Hunan     | 236.7 |
| Shanxi         | 234.0 | Guangdong | 236.7 |
| Inner Mongolia | 234.0 | Guangxi   | 236.7 |
| Liaoning       | 168.0 | Hainan    | 236.7 |
| Jilin          | 168.0 | Chongqing | 156.2 |
| Heilongjiang   | 168.0 | Sichuan   | 156.2 |
| Shanghai       | 215.5 | Guizhou   | 156.2 |
| Jiangsu        | 215.5 | Yunnan    | 156.2 |
| Zhejiang       | 215.5 | Xizang    | 156.2 |
| Anhui          | 215.5 | Shanxi    | 231.2 |
| Fujian         | 215.5 | Gansu     | 231.2 |
| Jiangxi        | 215.5 | Qinghai   | 231.2 |
| Shandong       | 215.5 | Ningxia   | 231.2 |
|                |       | Xinjiang  | 231.2 |

Note: Due to the differences in hydrothermal conditions in different regions, the CH<sub>4</sub> emission during the growth cycle of rice varies among regions. Studies have been conducted to consider the effects of each province.

**Table S4 Data source description**

| Deposited data                              | Source                                                                                       | Identifier                                                                                                                                                          |
|---------------------------------------------|----------------------------------------------------------------------------------------------|---------------------------------------------------------------------------------------------------------------------------------------------------------------------|
| Provincial grain yield (1980-2020)          | China Statistical Yearbook or bulletin of each province, autonomous region, and municipality | <a href="https://data.cnki.net/yearBook?type=type&amp;code=A">https://data.cnki.net/yearBook?type=type&amp;code=A</a>                                               |
| Provincial sown area (1980-2020)            | China Statistical Yearbook or bulletin of each province, autonomous region, and municipality | <a href="https://data.cnki.net/yearBook?type=type&amp;code=A">https://data.cnki.net/yearBook?type=type&amp;code=A</a>                                               |
| Provincial livestock production (1980-2020) | China Agricultural Statistical Yearbook                                                      | <a href="https://data.cnki.net/yearBook?type=type&amp;code=A">https://data.cnki.net/yearBook?type=type&amp;code=A</a>                                               |
| Provincial socioeconomic data (1980-2020)   | China Statistical Yearbook or bulletin of each province, autonomous region, and municipality | <a href="https://data.cnki.net/yearBook?type=type&amp;code=A">https://data.cnki.net/yearBook?type=type&amp;code=A</a>                                               |
| Import and export volumes                   | China Agricultural Statistical Yearbook                                                      | <a href="https://cnki.nbsti.net/CSYDMirror/trade/yearbook/Single/N2022030154?z=Z009">https://cnki.nbsti.net/CSYDMirror/trade/yearbook/Single/N2022030154?z=Z009</a> |
| The cost-benefit data of grain              | National Compilation of Cost-Benefit Data of Agricultural Products                           | <a href="https://data.cnki.net/yearBook/single?id=N2021120016&amp;pinyinCode=YNCSY">https://data.cnki.net/yearBook/single?id=N2021120016&amp;pinyinCode=YNCSY</a>   |
| Provincial SSPs data (2020-2060)            | Chen et al. (2020)                                                                           | <a href="https://doi.org/10.6084/m9.figshare.c.4605713.v1">https://doi.org/10.6084/m9.figshare.c.4605713.v1</a>                                                     |
| Meteorological data                         | National Meteorological Science Data Center                                                  | <a href="https://data.cma.cn/">https://data.cma.cn/</a>                                                                                                             |
| The railroad network data                   | The National Geomatics Centre of China                                                       | <a href="https://www.ngcc.cn/">https://www.ngcc.cn/</a>                                                                                                             |
| Other relevant parameters                   | CHANS model                                                                                  | <a href="https://person.zju.edu.cn/bjgu">https://person.zju.edu.cn/bjgu</a> <sup>1,6</sup>                                                                          |

**Table S5 | Water footprint of grain production in different provinces (m<sup>3</sup>/kg)**

| Province       | Water footprint | Green water footprint | Blue water footprint |
|----------------|-----------------|-----------------------|----------------------|
| Beijing        | 0.74            | 0.459                 | 0.281                |
| Tianjin        | 0.945           | 0.465                 | 0.48                 |
| Hebei          | 0.725           | 0.437                 | 0.288                |
| Shanxi         | 0.639           | 0.363                 | 0.276                |
| Inner Mongolia | 0.869           | 0.482                 | 0.387                |
| Liaoning       | 0.839           | 0.525                 | 0.314                |
| Jilin          | 0.737           | 0.526                 | 0.211                |
| Heilongjiang   | 1.197           | 0.71                  | 0.487                |
| Shanghai       | 1.915           | 0.546                 | 1.369                |
| Jiangsu        | 1.171           | 0.575                 | 0.596                |
| Zhejiang       | 1.735           | 0.609                 | 1.126                |
| Anhui          | 1.265           | 0.813                 | 0.452                |
| Fujian         | 1.886           | 0.596                 | 1.29                 |
| Jiangxi        | 1.299           | 0.606                 | 0.693                |
| Shandong       | 0.623           | 0.451                 | 0.172                |
| Henan          | 0.76            | 0.59                  | 0.17                 |
| Hubei          | 1.147           | 0.835                 | 0.312                |
| Hunan          | 1.145           | 0.616                 | 0.529                |
| Guangdong      | 1.898           | 0.88                  | 1.018                |
| Guangxi        | 1.948           | 0.924                 | 1.024                |
| Hainan         | 2.813           | 0.934                 | 1.879                |
| Chongqing      | 1.002           | 0.746                 | 0.256                |
| Sichuan        | 1.003           | 0.592                 | 0.411                |
| Guizhou        | 1.487           | 1.098                 | 0.389                |
| Yunnan         | 1.351           | 1.086                 | 0.265                |
| Xizang         | 2.206           | 0.569                 | 1.637                |
| Shanxi         | 1.273           | 0.925                 | 0.348                |
| Gansu          | 1.314           | 0.635                 | 0.679                |
| Qinghai        | 1.708           | 0.865                 | 0.843                |
| Ningxia        | 1.425           | 0.416                 | 1.009                |
| Xinjiang       | 1.335           | 0.197                 | 1.138                |

Ref: Environmental impact of grain virtual water flows in China: From 1997 to 2014

**Table S6** The turning points of temperature to yield

|       | U shape    | TP    |
|-------|------------|-------|
| Grain | Inverted-U | 11.27 |
| Rice  | Inverted-U | 16.96 |
| Wheat | Inverted-U | 9.2   |
| Maize | Inverted-U | 10.6  |

The turning point (TP) of temperature (°C) is calculated based on regression results of models [of equation \(5\)](#). Regression results are listed in Supplementary Tables 10–12.

**Table S7 | The Model Coefficients and P-values of structural equation model for grain yield shown in Figure 3d.**

| Predictor         | Effect                | Coefficients | P-values | Contribution |
|-------------------|-----------------------|--------------|----------|--------------|
| <b>Mechanical</b> | Direct effect         | 0.92         | (0.000)  | 61%          |
| <b>Ageing</b>     | Direct effect         | -0.16        | (0.000)  | 25%          |
|                   | Indirect → Mechanical | 0.21         |          |              |
| <b>Farm size</b>  | Direct effect         | 0.02         | (0.142)  | 15%          |
|                   | Indirect → Mechanical | 0.2          |          |              |

**Table S8 | The Model Coefficients and P-values for structural equation model for grain trade shown in Figure 3f.**

| Predictor           | Effect               | Coefficients | P-values | Contribution |
|---------------------|----------------------|--------------|----------|--------------|
| <b>Urbanization</b> | Direct effect        | 0.8          | (0.000)  | 27%          |
|                     | Indirect effect→Diet | 0.06         |          |              |
| <b>Population</b>   | Direct effect        | -0.9         | (0.000)  | 33%          |
|                     | Indirect effect→Diet | -0.14        |          |              |
| <b>Diet</b>         | Direct effect        | -0.24        | (0.001)  | 8%           |
| <b>Yield</b>        | Direct effect        | 0.85         | (0.000)  | 32%          |
|                     | Indirect effect→Diet | 0.18         |          |              |



**Table S9 Monetized tax parameters for nitrogen pollution and GHG emissions**

|                              |        |      |                                                                                                                                                                                                                                                                                                                                                                                                                                                                                                                                                                                                                                                        |
|------------------------------|--------|------|--------------------------------------------------------------------------------------------------------------------------------------------------------------------------------------------------------------------------------------------------------------------------------------------------------------------------------------------------------------------------------------------------------------------------------------------------------------------------------------------------------------------------------------------------------------------------------------------------------------------------------------------------------|
| GHG (\$/t CO <sub>2e</sub> ) | Low    | 10   | The trading price in China's current carbon market is ~US\$10 (as the minimum cost) <sup>7</sup> , while achieving the Paris Agreement's goal necessitates a cost-effective price of US\$100 (as the maximum cost) <sup>8</sup> . A carbon price of US\$50 is considered as medium value <sup>9,10</sup> .                                                                                                                                                                                                                                                                                                                                             |
|                              | Medium | 50   |                                                                                                                                                                                                                                                                                                                                                                                                                                                                                                                                                                                                                                                        |
|                              | High   | 100  |                                                                                                                                                                                                                                                                                                                                                                                                                                                                                                                                                                                                                                                        |
| NH <sub>3</sub> (\$/kg)      | Low    | 0.9  | According to Law of China Environmental Protection Tax (LCEPT) <sup>11</sup> , the tax value of air pollutants ranges from 1.2 to 12 CNY per kg. In this study, the average value of US\$0.9 <sup>c</sup> is considered as the minimum price. Previous studies have concluded that China currently massively underestimates the social damage of NH <sub>3</sub> <sup>12</sup> . Referring to Keeler et al <sup>13</sup> , this study estimates the regional damage cost of NH <sub>3</sub> in China, and the value in 2020 is US\$23, regarded as the highest cost. The average value of tax law and damage cost US\$12 is taken as the medium value. |
|                              | Medium | 12   |                                                                                                                                                                                                                                                                                                                                                                                                                                                                                                                                                                                                                                                        |
|                              | High   | 23   |                                                                                                                                                                                                                                                                                                                                                                                                                                                                                                                                                                                                                                                        |
| NO <sub>x</sub> (\$/kg)      | Low    | 1.3  | Based on the applicable tax laws for NO <sub>x</sub> in each province of China <sup>14</sup> , the median value of US\$1.3 is taken as the minimum cost. Similarly, this study estimates the regional damage cost of NO <sub>x</sub> in China, which is far greater than the taxed price, taking the 2020 value of US\$24 as the maximum cost. The medium value was taken as the average of the two values US\$13.                                                                                                                                                                                                                                     |
|                              | Medium | 13   |                                                                                                                                                                                                                                                                                                                                                                                                                                                                                                                                                                                                                                                        |
|                              | High   | 24   |                                                                                                                                                                                                                                                                                                                                                                                                                                                                                                                                                                                                                                                        |
| NO <sub>3</sub> - (\$/kg)    | Low    | 1    | According to LCEPT, the average value of water pollution is considered as the minimum price (~US\$1.0). Similarly, this study estimates the regional damage cost of NO <sub>3</sub> <sup>-</sup> in China, taking the 2020 value of ~US\$18.9 as the maximum cost; and the medium value is taken as the average of the two values.                                                                                                                                                                                                                                                                                                                     |
|                              | Medium | 10   |                                                                                                                                                                                                                                                                                                                                                                                                                                                                                                                                                                                                                                                        |
|                              | High   | 18.9 |                                                                                                                                                                                                                                                                                                                                                                                                                                                                                                                                                                                                                                                        |

Note:

<sup>a</sup> The LCEPT specifies a pollution taxable equivalent of 9.09 for NH<sub>3</sub>, but based on expert judgment, the social damages of NH<sub>3</sub> pollution are probably far underestimated here, and therefore the pollution taxable equivalent value for ammonia nitrogen is used here instead.

<sup>b</sup> The monetary treatment here aims to reflect the relative value of Nr and GHGs under climate objectives, policy intensity, and environmental damage.

<sup>c</sup> Based on China's National Bureau of Statistics, the exchange rate for the U.S. dollar to RMB in 2020 was 6.897.

## REFERENCE:

1. Gu, B., Ju, X., Chang, J., Ge, Y. & Vitousek, P. M. Integrated reactive nitrogen budgets and future trends in China. *Proceedings of the National Academy of Sciences* **112**, 8792–8797 (2015).
2. Xu, X. *et al.* Integrated carbon and nitrogen management for cost-effective environmental policies in China. *Science* **388**, 1098–1103 (2025).
3. Intergovernmental Panel on Climate Change. *Climate Change 2021: The Physical Science Basis. Contribution of Working Group I to the Sixth Assessment Report of the Intergovernmental Panel on Climate Change*. <https://www.ipcc.ch/report/ar6/wg1/> (2021).
4. Intergovernmental Panel on Climate Change. *Climate Change: The IPCC Scientific Assessment*. (1990).
5. Wang, C. *et al.* An empirical model to estimate ammonia emission from cropland fertilization in China. *Environmental Pollution* **288**, 117982 (2021).
6. Zhang, X. *et al.* Ammonia Emissions May Be Substantially Underestimated in China. *Environmental Science & Technology* **51**, 12089–12096 (2017).
7. Shi, B., Li, N., Gao, Q. & Li, G. Market incentives, carbon quota allocation and carbon emission reduction: Evidence from China's carbon trading pilot policy. *Journal of Environmental Management* **319**, 115650 (2022).
8. Glanemann, N., Willner, S. N. & Levermann, A. Paris Climate Agreement passes the cost-benefit test. *Nat Commun* **11**, 110 (2020).
9. Tian, L., Ye, Q. & Zhen, Z. A new assessment model of social cost of carbon and its situation analysis in China. *Journal of Cleaner Production* **211**, 1434–1443 (2019).
10. Lu, N. *et al.* Biophysical and economic constraints on China's natural climate solutions. *Nat. Clim. Chang.* **12**, 847–853 (2022).
11. State Council of China, Environmental Protection Tax Law of the People's Republic of China (Draft for Comments). [https://english.mofcom.gov.cn/Policies/LawsRegulations/art/2013/art\\_f1de59700ebd47c69367af1013f6daef.html](https://english.mofcom.gov.cn/Policies/LawsRegulations/art/2013/art_f1de59700ebd47c69367af1013f6daef.html) (2015).
12. Gu, B. J. *et al.* Abating ammonia is more cost-effective than nitrogen oxides for mitigating PM<sub>2.5</sub> air pollution. *SCIENCE* **374**, 758–+ (2021).
13. Keeler, B. L. *et al.* The social costs of nitrogen. *Science Advances* **2**, e1600219 (2016).
14. Liu, F. *et al.* Regionalized life-cycle monetization can support the transition to

sustainable rural food waste management in China. *Nat Food* **4**, 797–809 (2023).
